# Supplementary material for: Achieving 18.92% efficiency of non-fullerene organic solar cells with active layer morphology optimization by regulating solvent evaporation dynamics
Source: Royal Society of Chemistry journal article supplement (doi:10.1039/d4tc02594f), 2024-01-01
Supplement: d4tc02594f1.pdf [file d4tc02594f1.pdf]

## Supporting Information

### **Achieving 18.92 % efficiency of non-fullerene organic solar cells with active layer morphology optimization by regulating solvent evaporation dynamics**

*Mandi Li, Fenghua zhang, Xiong Li\*, Dan Wang, Yang Liu, Denghui Xu, Jia Zhao, Yaohui Zhu, Jun Zhou*

Department of Physics, Beijing Technology and Business University, Beijing 100048, China

E-mail: [lixiong@btbu.edu.cn](mailto:lixiong@btbu.edu.cn)

## **Experimental Section:**

### **1. Materials:**

Polymer donor D18, non-fullerene acceptor L8-BO and cathode buffer layer material PDINN were purchased from Solarmer Material Inc. Anode buffer layer PEDOT: PSS was obtained from Heraeus (Clevios P A14083). Solvent chloroform (CF) and toluene (Tol) were obtained from J&K Scientific Ltd. The pre-patterned indium tin oxide (ITO) coated glass substrates (sheet resistance of  $15 \Omega/\text{Sq}$ ) were obtained from Huananxiangcheng Technology Co. High-purity argentine (purity > 99.99%) was used for the evaporation of electrode. All the materials were used as received without any further treatment.

### **2. Solution Preparation:**

D18:L8-BO were dissolved in CF or CF:Tol solvent at a concentration of 7.2 mg/ml with weight ratio of 1:1, and then the blend solution was stirred at least 6 h at 50 °C. The cathode buffer layer solution was prepared by dissolving PDINN in methanol (2 mg/ml) and then stirred overnight at room temperature.

### **3. Device Fabrication:**

Patterned ITO electrode was cleaned by sequential sonication in deionized water, acetone, ethyl alcohol each for 30 min, then dried by high-purity nitrogen gas. After 8 min ultraviolet-ozone treatment for the ITO substrate, anode buffer layer was prepared by spin-coating PEDOT:PSS aqueous solution with speed of 3500 rpm and then thermal-annealed at 150 °C for 30 min, then the PEDOT: PSS anode buffer layer was obtained with the thickness of about 30 nm. After that, the treated ITO/PEDOT:PSS films were transferred into a high-purity nitrogen-filled glove box (<0.01 ppm O<sup>2</sup> and H<sub>2</sub>O) to fabricate active layers and cathode interlayers. The D18:L8-BO blend films were spin-coated onto the PEDOT:PSS layer with a thickness of about 100 nm. Subsequently, PDINN interlayer was obtained by spin-casting on top of active layers with the thickness of about 10 nm. Finally, Ag of about 100 nm was thermally deposited

on the PDIN layer under the vacuum of  $2 \times 10^{-4}$  Pa, and the deposition rate and thickness of Ag was in situ recorded with a quartz crystal oscillator monitor. The effective area of organic solar cells is  $0.045 \text{ cm}^2$ , which is defined by the overlap of ITO anode and Ag cathode.

#### **4. Instruments and Characterization:**

The  $J$ - $V$  characteristics of the OSCs were measured in a nitrogen glove box with a Keithley 2410 Source Measure under  $100 \text{ mW/cm}^2$  illumination with AM 1.5 solar simulator (San-Ei Electric). AM 1.5 G solar simulator was calibrated by standard silicon solar cells (purchased from Enlitech). The ultraviolet-visible-near infrared (UV-Vis-NIR) absorption spectra were conducted with Hatachi-U3900H spectrophotometer. The photoluminescence (PL) spectra of the films were performed with fluorescence spectrometer (Spex Fluorolog-3). The external quantum efficiency (EQE) was conducted with a solar cell QE/IPCE measurement system (Zolix solar cell scan100). Transient photovoltage (TPV), transient photocurrent (TPC) and photo-induced charge extraction linear increasing voltage (Photo-CELIV) were conducted with the Paios system (FLUXiM AG, Switzerland). The integrated power of the LED for the Paios system is  $720 \text{ W/m}^2$ . AFM measurements were performed with a Bruker-Fast scan ultrafast DI AFM. The GIWAXS data were obtained at 1W1A Diffuse X-ray Scattering Station, Beijing Synchrotron Radiation Facility (BSRF-1W1A). The contact angle images were obtained with contact angle measurement system (Dataphysics OCA15Pro). The optimized thickness of the active layer is  $\sim 100 \text{ nm}$ , which was measured by Bruker Stylus Profile (Dektak XT, Bruker Corporation).

## 5. Additional experimental results:

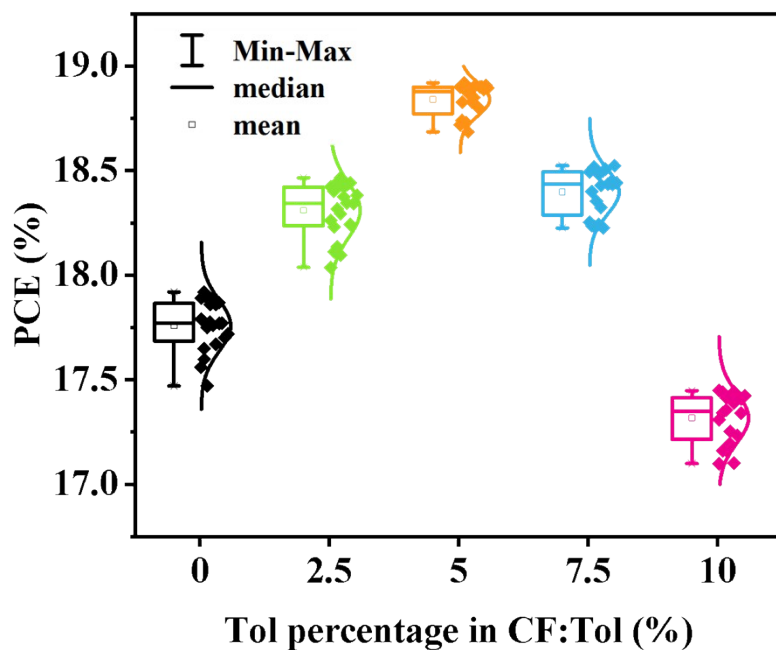

Figure S1. Statistical results of PCE for the OSCs with different CF:Tol ratio.

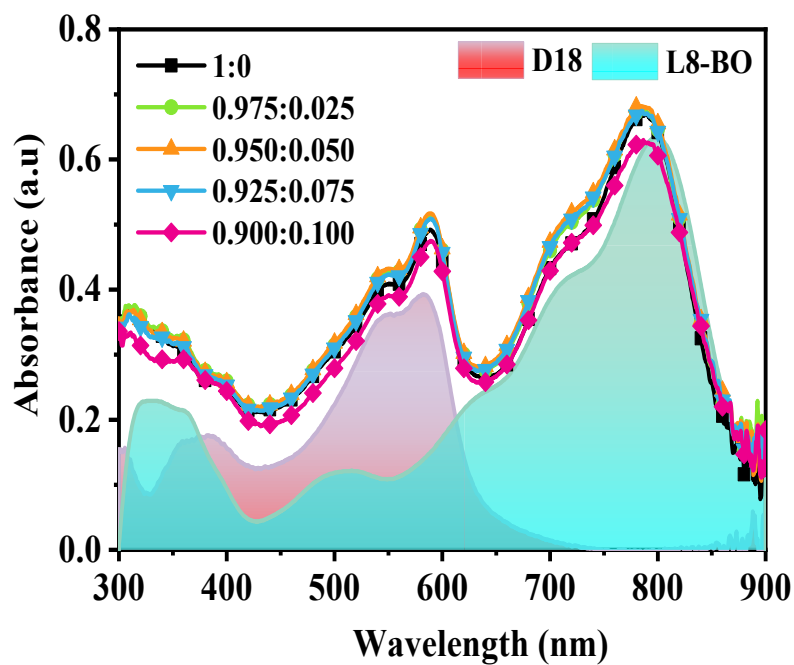

Figure S2. The absorbance curves of D18:L8-BO blend films with different CF:Tol ratio.

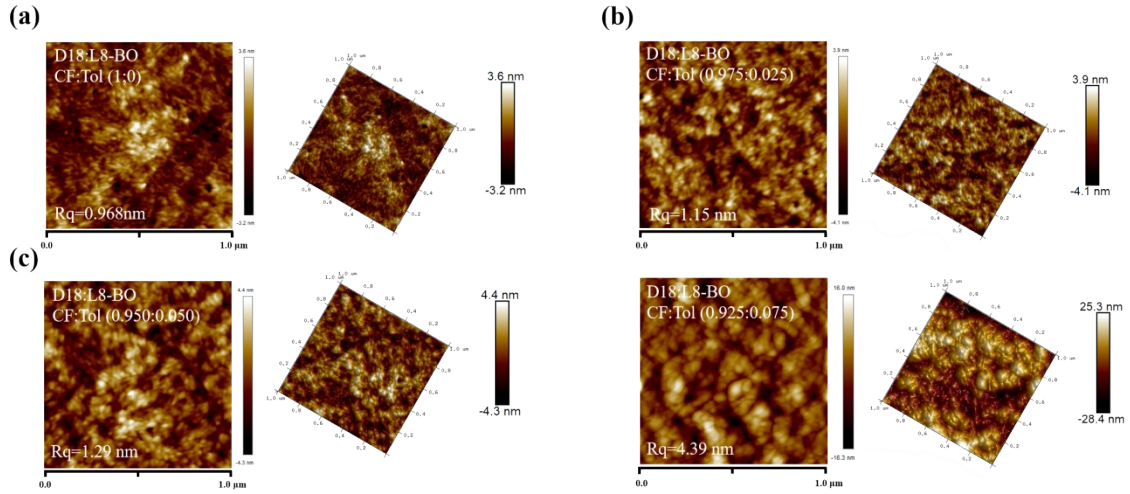

**Figure S3.** AFM height images of D18:L8-BO films obtained from (a) CF and (b-d) CF:Tol mixed solvent.

**Table S1.** Summary of the photovoltaics parameters of OSCs prepared with different CF:Tol ratio under illumination of AM 1.5G, 100 mA/cm<sup>2</sup>.

| CF:Tol      | $J_{SC}$<br>(mA/cm <sup>2</sup> ) | $J_{cal}^a$<br>(mA/cm <sup>2</sup> ) | $V_{OC}$<br>(V) | FF<br>(%) | PCE<br>(%)                                     |
|-------------|-----------------------------------|--------------------------------------|-----------------|-----------|------------------------------------------------|
| 1:0         | 25.90                             | 24.62                                | 0.923           | 74.99     | 17.89 <sup>b</sup> (17.76 ± 0.16) <sup>c</sup> |
| 0.975:0.025 | 26.17                             | 24.91                                | 0.927           | 76.08     | 18.47 <sup>b</sup> (18.31 ± 0.17) <sup>c</sup> |
| 0.950:0.050 | 26.43                             | 25.28                                | 0.927           | 77.24     | 18.92 <sup>b</sup> (18.83 ± 0.08) <sup>c</sup> |
| 0.925:0.075 | 26.19                             | 24.95                                | 0.921           | 76.77     | 18.52 <sup>b</sup> (18.40 ± 0.13) <sup>c</sup> |
| 0.900:0.100 | 25.60                             | 24.47                                | 0.911           | 74.82     | 17.45 <sup>b</sup> (17.32 ± 0.12) <sup>c</sup> |

<sup>a</sup> The integral current density from EQE spectra, <sup>b</sup> the maximum values of the devices,

<sup>c</sup> the average values and deviation obtained from 20 devices.

**Table S2.** GIWAXS parameters of the OSCs prepared different CF:Tol ratio.

| CF:Tol | In plane             |                                  |                     | Out of plane         |                                  |                     |
|--------|----------------------|----------------------------------|---------------------|----------------------|----------------------------------|---------------------|
|        | $q(\text{\AA}^{-1})$ | $d_{\text{spacing}}(\text{\AA})$ | CCL( $\text{\AA}$ ) | $q(\text{\AA}^{-1})$ | $d_{\text{spacing}}(\text{\AA})$ | CCL( $\text{\AA}$ ) |

|           |        |       |       |        |      |       |
|-----------|--------|-------|-------|--------|------|-------|
| 1:0       | 0.3170 | 19.82 | 18.17 | 1.7186 | 3.66 | 15.09 |
| 0.95:0.05 | 0.3270 | 19.21 | 18.08 | 1.7353 | 3.62 | 18.16 |

**Table S3.** Water contact angle related parameters.

| film                      | D18   | L8-BO | D18:L8-BO<br>CF | D18:L8-BO<br>CF:Tol(0.95:0.05) |
|---------------------------|-------|-------|-----------------|--------------------------------|
| contact angle (° )        | 106.9 | 94    | 103.9           | 101.15                         |
| L8-BO surface content (%) | /     | /     | 22.8            | 44.1                           |
